# Supplementary material for: Ionic liquid polymer materials with tunable nanopores controlled by surfactant aggregates: a novel approach for CO2 capture
Source: Royal Society of Chemistry journal article supplement (doi:10.1039/c9ta13077b), 2020-01-01
Supplement: c9ta13077b1.pdf [file c9ta13077b1.pdf]

## Electronic Supplementary Information, ESI

# Ionic liquid polymer materials with tunable nanopores controlled by surfactant aggregates: A novel approach for CO<sub>2</sub> capture

Ambavaram Vijaya Bhaskar Reddy,<sup>a</sup> Muhammad Moniruzzaman,<sup>a,b,\*</sup> Mohamad A. Bustam,<sup>a,b</sup> Masahiro Goto,<sup>c</sup> Bidyut B. Saha<sup>d</sup> and Christoph Janiak<sup>e,\*</sup>

<sup>a</sup> Centre of Research in Ionic Liquids, Universiti Teknologi PETRONAS, Seri Iskandar 32610, Perak, Malaysia

<sup>b</sup> Department of Chemical Engineering, Universiti Teknologi PETRONAS, Seri Iskandar 32610, Perak, Malaysia

<sup>c</sup> Department of Applied Chemistry and Center for Future Chemistry, Kyushu University, 744 Motooka, Nishi-ku, Fukuoka 819-0395, Japan

<sup>d</sup> International Institute for Carbon-Neutral Energy Research (WPI-I2CNER), and Department of Mechanical Engineering, Graduate School of Engineering, Kyushu University, 744 Motooka, Nishi-ku, Fukuoka 819-0395, Japan

<sup>e</sup> Institute of Inorganic and Structural Chemistry, Heinrich-Heine-University, 40204 Düsseldorf, Germany

E-mail addresses: [vijay.dr555@gmail.com](mailto:vijay.dr555@gmail.com), [m.moniruzzaman@utp.edu.my](mailto:m.moniruzzaman@utp.edu.my),  
[azmibustam@utp.edu.my](mailto:azmibustam@utp.edu.my), [m-goto@mail.cstm.kyushu-u.ac.jp](mailto:m-goto@mail.cstm.kyushu-u.ac.jp),  
[saha.baran.bidyut.213@m.kyushu-u.ac.jp](mailto:saha.baran.bidyut.213@m.kyushu-u.ac.jp), [janiak@uni-duesseldorf.de](mailto:janiak@uni-duesseldorf.de)

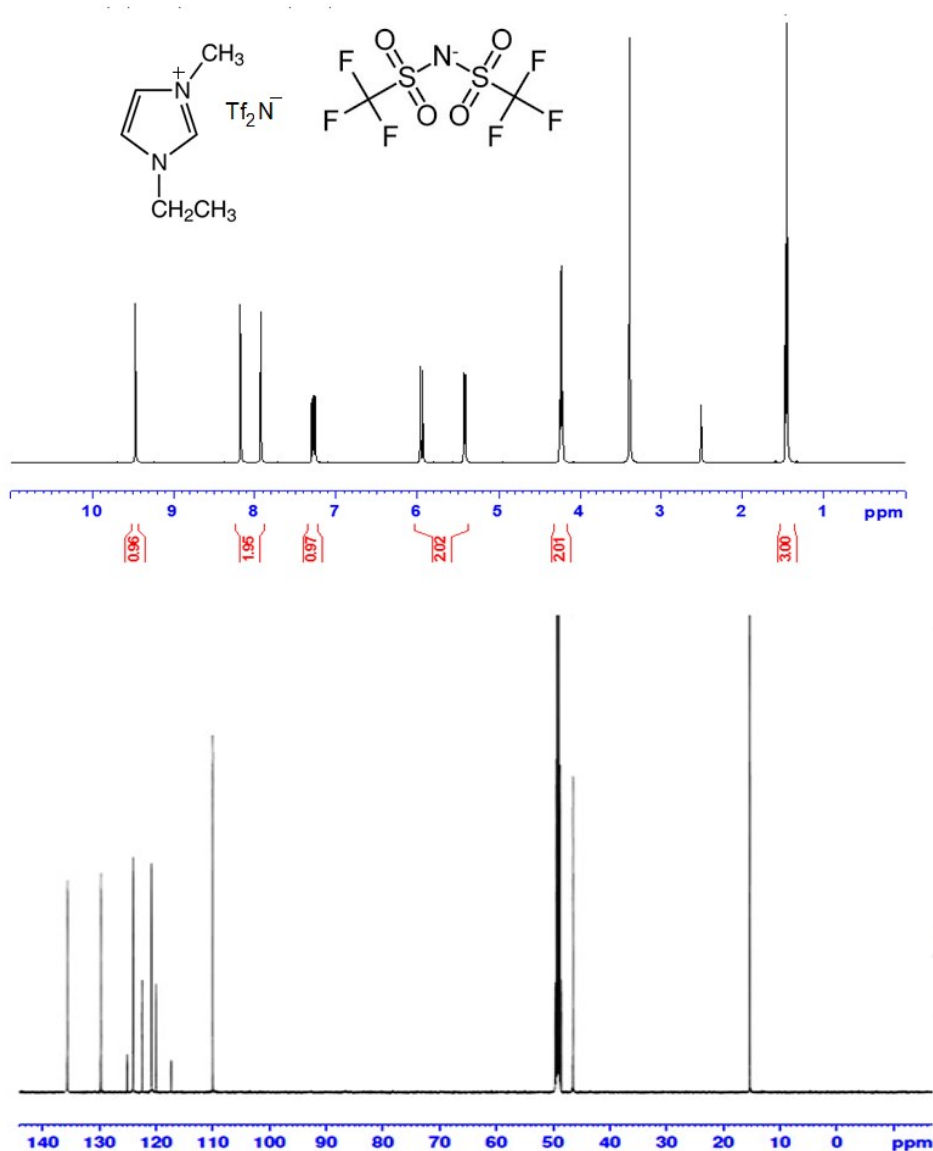

$^1\text{H NMR}$  (500MHz; MeOD,  $\delta/\text{ppm}$ ): 9.51 (s, 1H, N-CH-N); 8.22 (s, 1H; N-CH-CH-N); 7.89 (s, 1H, N-CH-CH-N); 7.33 (dd, 1H, N-CH-CH<sub>2</sub>); 5.95 (dd, 1H, N-CH-CH<sub>2</sub>), 5.39 (dd, 2H, N-CH-CH<sub>2</sub>); 4.273 (q, 2H, N-CH<sub>2</sub>-CH<sub>3</sub>); 1.44 (t, 3H, CH<sub>2</sub>-CH<sub>3</sub>).

$^{13}\text{C NMR}$  (500MHz; MeOD,  $\delta/\text{ppm}$ ): 14.89, 49.12, 110.05, 119.50, 121.10, 122.05, 124.25, 130.50, 136.05.

**Figure S1**  $^1\text{H NMR}$  and  $^{13}\text{C NMR}$  spectra of the synthesized [veim][Tf<sub>2</sub>N] monomer.

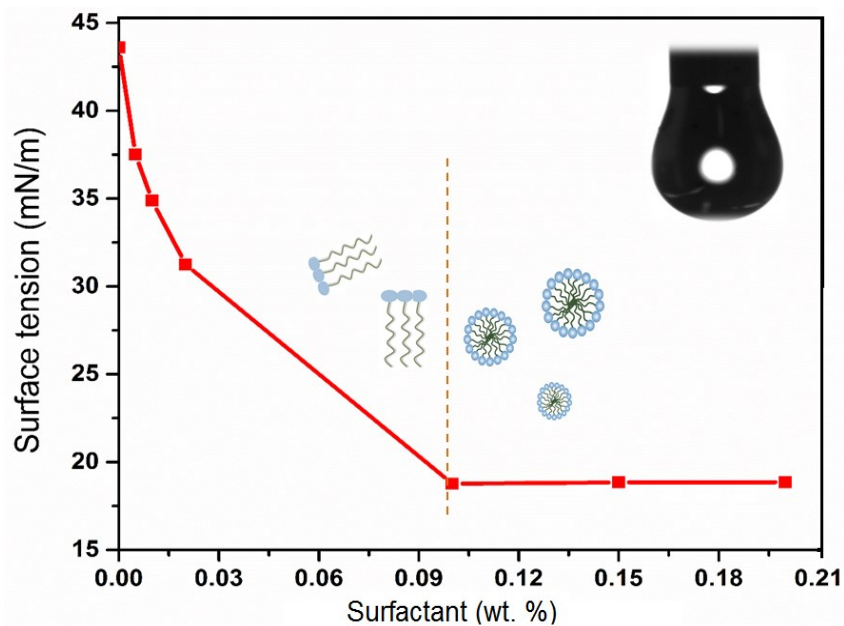

**Figure S2** Determination of critical micelle concentration (CMC) of surfactant from the surface tension curve with respect to the surfactant weight percentage in [veim][Tf<sub>2</sub>N]-chloroform solution.

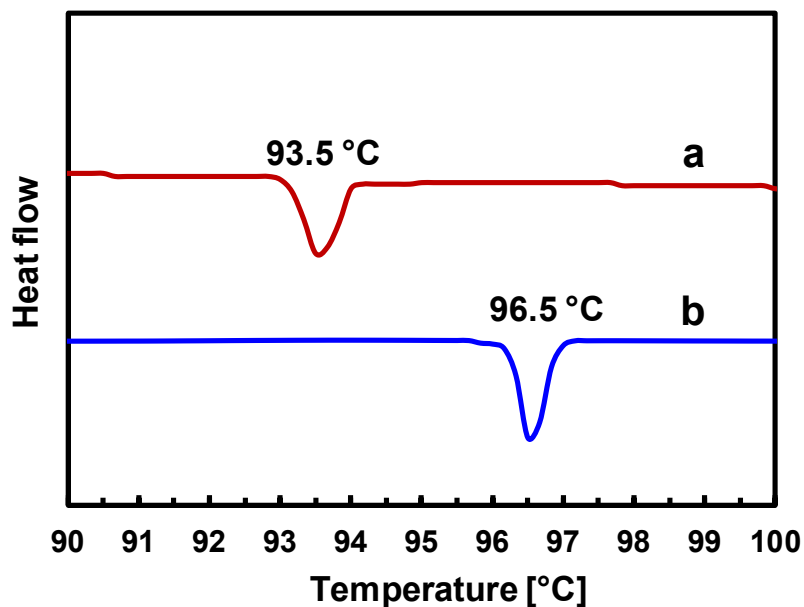

**Figure S3** Differential scanning calorimetry (DSC) cooling curves of polymers (a) poly[veim][Tf<sub>2</sub>N] and (b) 10 wt% SMI-poly[veim][Tf<sub>2</sub>N] at 10 °C/min. The minima indicate exothermic events.

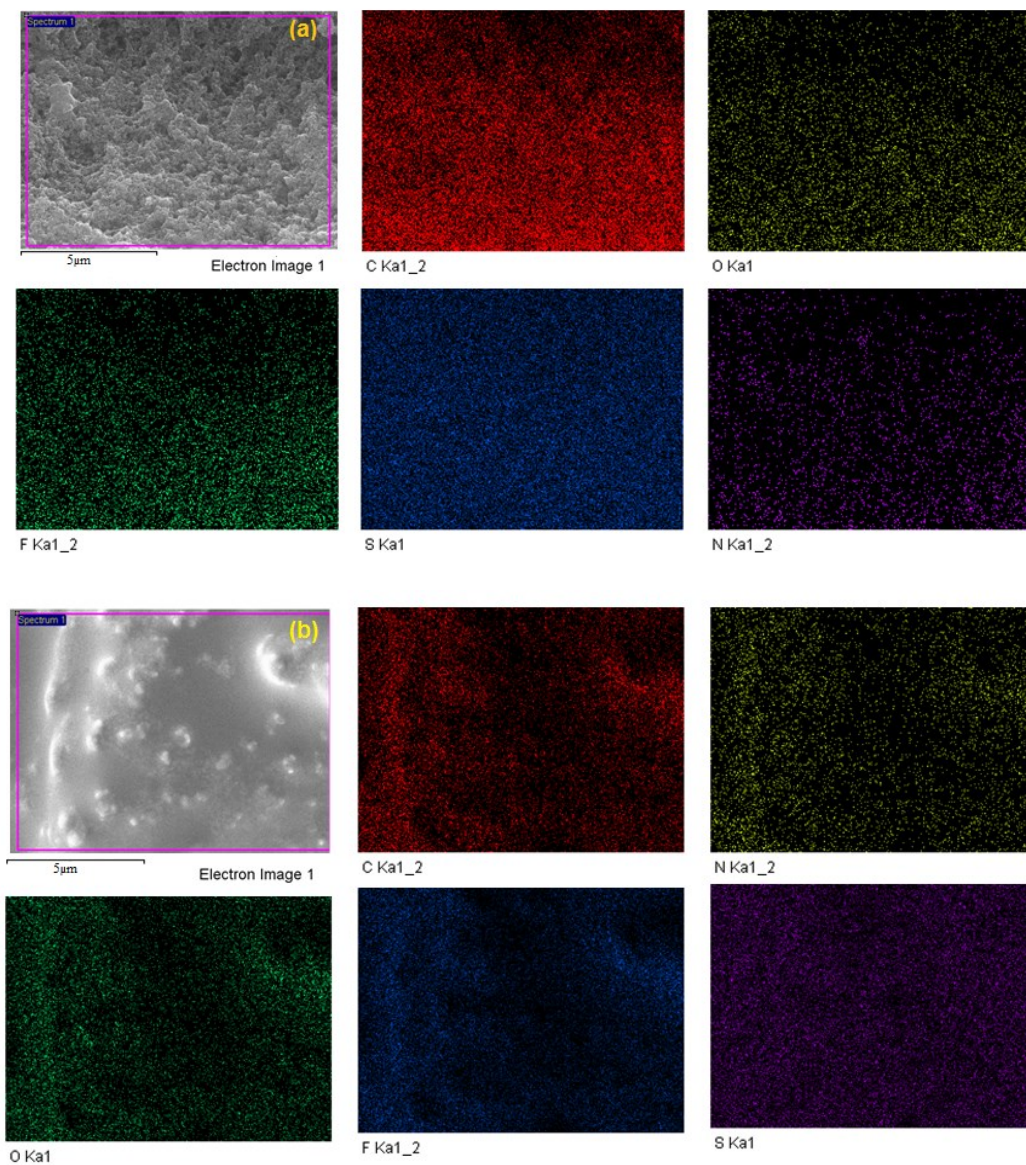

**Figure S4** SEM images with energy dispersive X-ray (EDX) spectroscopic elemental mapping for (a) poly[veim][Tf<sub>2</sub>N] alone, and (b) 1.0 wt% SMI-poly[veim][Tf<sub>2</sub>N] composite. The mapping of individual elements i.e., C, O, F, S, N confirmed the uniform distribution of surfactant micelles within the poly[veim][Tf<sub>2</sub>N] material.

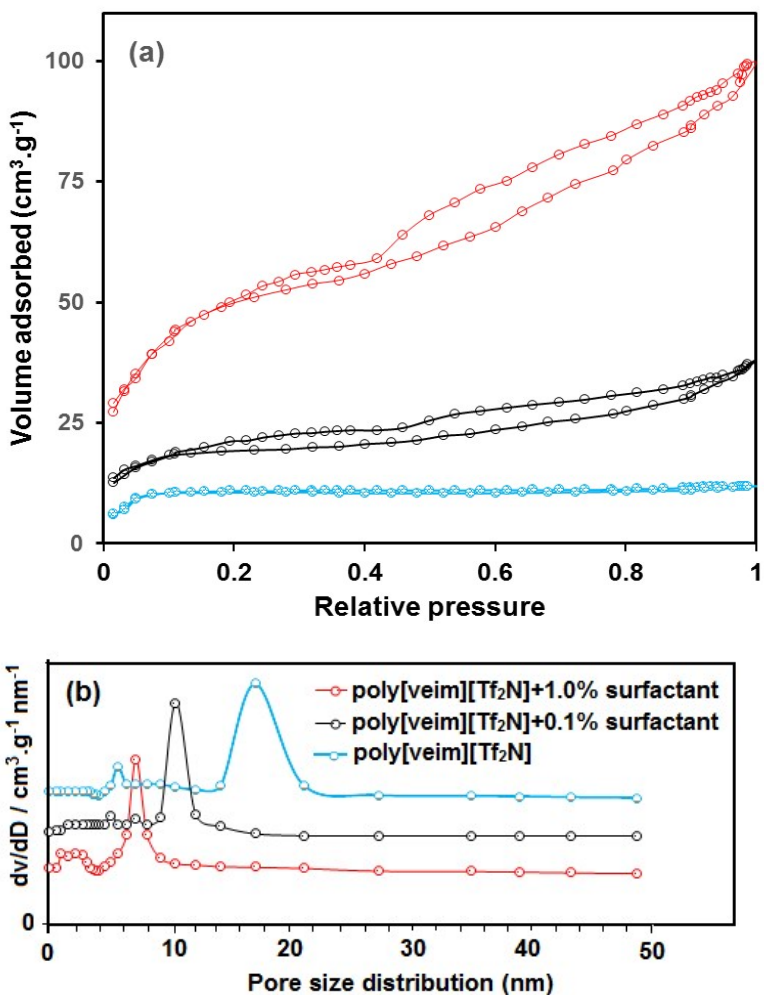

**Figure S5** (a)  $N_2$  sorption isotherms and the corresponding (b) pore size distribution curves of poly[veim][Tf<sub>2</sub>N] alone (blue), 0.1 wt% SMI-poly[veim][Tf<sub>2</sub>N] (black) and 1.0 wt% SMI-poly[veim][Tf<sub>2</sub>N] (red) composites.



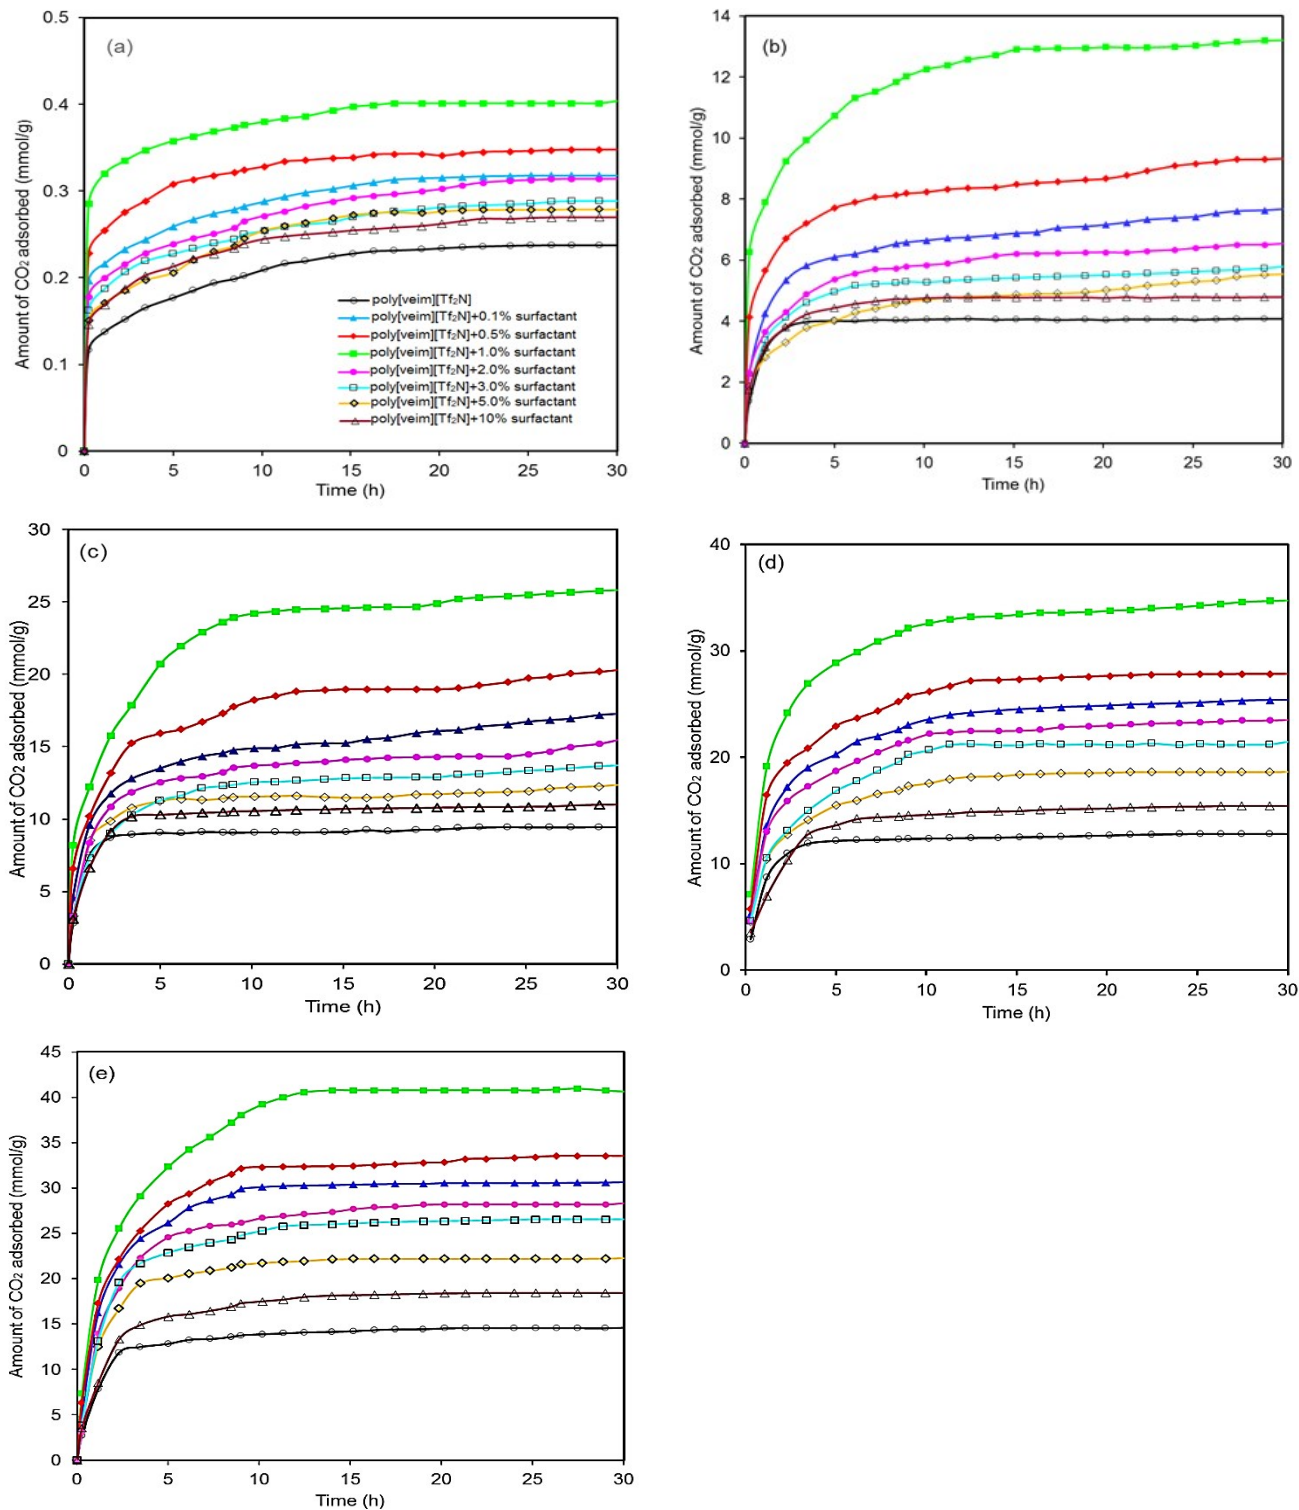

**Figure S6** CO<sub>2</sub> sorption capacity of different poly[veim][Tf<sub>2</sub>N] and its SMI-poly[veim][Tf<sub>2</sub>N] materials at (a) 1.0 bar, (b) 5.0 bar, (c) 10 bar, (d) 15 bar and (e) 20 bar pressure.

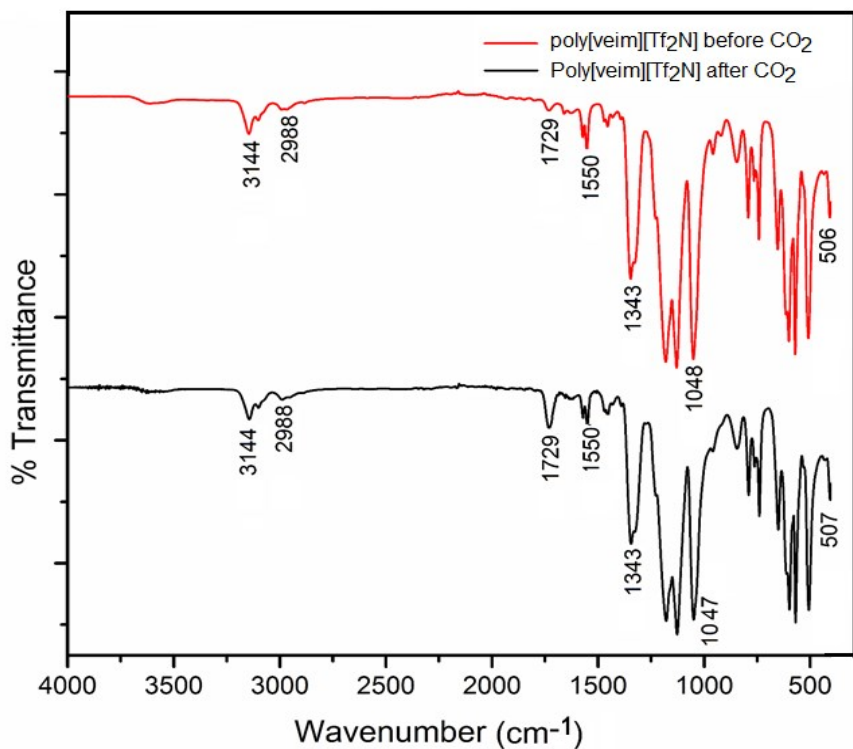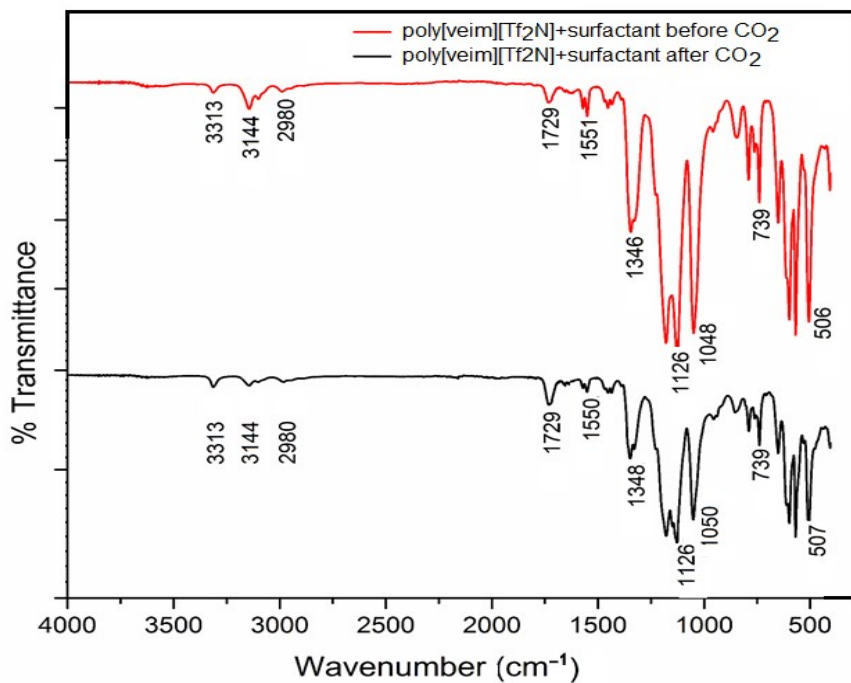

**Figure S7** FT-IR spectra of (a) poly[veim][Tf<sub>2</sub>N], and (b) 1.0 wt% SMI-poly[veim][Tf<sub>2</sub>N] materials before and after CO<sub>2</sub> adsorption.

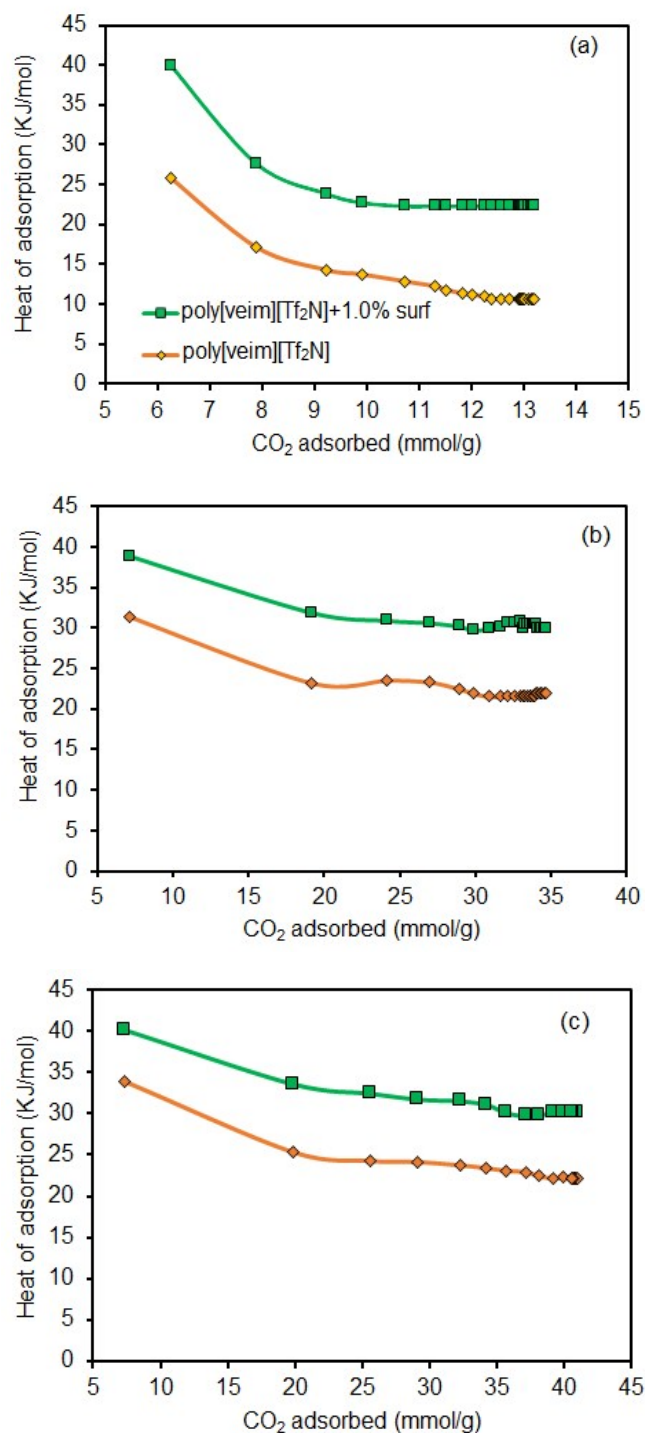

**Figure S8**  $CO_2$  isosteric heat of adsorption ( $Q_{st}$ ) of poly[veim][Tf<sub>2</sub>N] and 1.0 wt% SMI-poly[veim][Tf<sub>2</sub>N] materials calculated at 298 K and 308 K using the Clausius-Clapeyron equation for (a) 5.0 bar, (b) 15 bar, and (c) 20 bar.



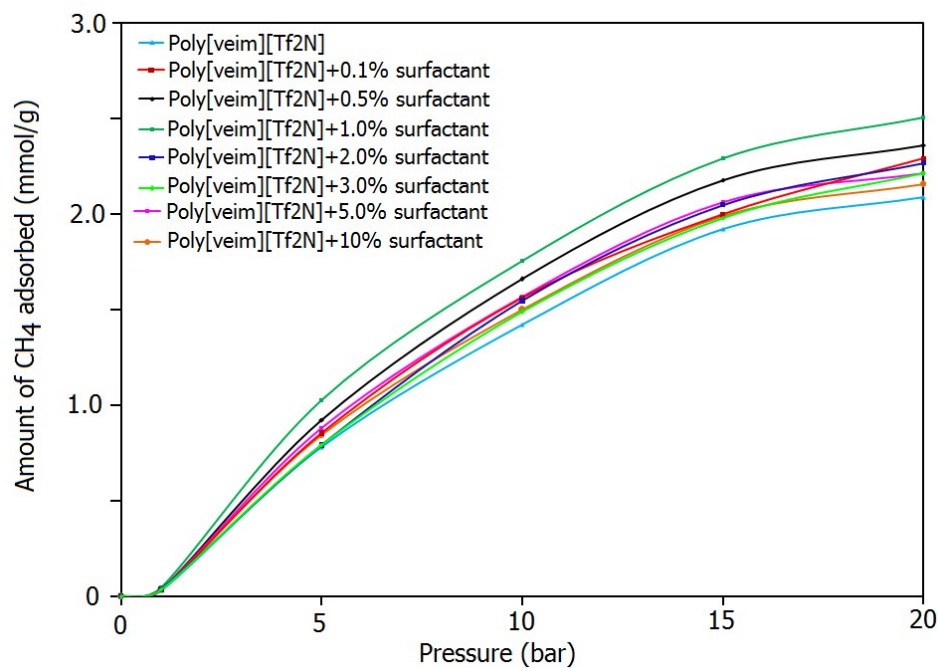

**Figure S9** CH<sub>4</sub> sorption capacity of different poly[veim][Tf<sub>2</sub>N] and its SMI-poly[veim][Tf<sub>2</sub>N] materials measured at 1.0 bar, 5.0 bar, 10 bar, 15 bar, and 20 bar pressure.

**Table S1** Elemental composition of poly[veim][Tf<sub>2</sub>N] and its SMI-poly[veim][Tf<sub>2</sub>N] materials in terms of weight percent (wt%) determined by EDX.

| Sample name                                   | Element content (wt%) |      |      |      |      |
|-----------------------------------------------|-----------------------|------|------|------|------|
|                                               | C                     | N    | O    | F    | S    |
| Poly[veim][Tf <sub>2</sub> N]                 | 43.6                  | 8.4  | 10.8 | 12.7 | 20.9 |
| Poly[veim][Tf <sub>2</sub> N]+0.1% surfactant | 39.2                  | 10.3 | 13.4 | 15.0 | 12.1 |
| Poly[veim][Tf <sub>2</sub> N]+0.5% surfactant | 38.9                  | 10.8 | 12.2 | 18.1 | 13.7 |
| Poly[veim][Tf <sub>2</sub> N]+1.0% surfactant | 36.8                  | 11.3 | 11.2 | 21.4 | 14.4 |
| Poly[veim][Tf <sub>2</sub> N]+2.0% surfactant | 33.6                  | 11.8 | 14.0 | 24.6 | 13.3 |
| Poly[veim][Tf <sub>2</sub> N]+3.0% surfactant | 31.6                  | 12.4 | 13.9 | 27.4 | 11.2 |
| Poly[veim][Tf <sub>2</sub> N]+5.0% surfactant | 28.3                  | 13.7 | 13.2 | 32.5 | 10.1 |
| Poly[veim][Tf <sub>2</sub> N]+10% surfactant  | 24.3                  | 15.1 | 12.2 | 37.1 | 9.8  |

**Table S2** BET surface area, pore volume and average pore diameter of all synthesized SMI-ILPs.

| Sample name                                   | BET Surface area <sup>a</sup> | Pore volume <sup>b</sup> | Pore size <sup>c</sup> |
|-----------------------------------------------|-------------------------------|--------------------------|------------------------|
|                                               | (m <sup>2</sup> /g)           | (cm <sup>3</sup> /g)     | (nm)                   |
| Poly[veim][Tf <sub>2</sub> N]                 | 27                            | 0.14                     | 20                     |
| Poly[veim][Tf <sub>2</sub> N]+0.1% Surfactant | 69                            | 0.16                     | 9                      |
| Poly[veim][Tf <sub>2</sub> N]+0.5% Surfactant | 132                           | 0.29                     | 8                      |
| Poly[veim][Tf <sub>2</sub> N]+1.0% Surfactant | 228                           | 0.42                     | 7                      |
| Poly[veim][Tf <sub>2</sub> N]+2.0% Surfactant | 208                           | 0.31                     | 6                      |
| Poly[veim][Tf <sub>2</sub> N]+3.0% Surfactant | 164                           | 0.28                     | 6                      |
| Poly[veim][Tf <sub>2</sub> N]+5.0% Surfactant | 127                           | 0.20                     | 6                      |
| Poly[veim][Tf <sub>2</sub> N]+10% Surfactant  | 47                            | 0.17                     | 15                     |

<sup>a</sup> calculated from BET equation based on N<sub>2</sub> adsorption isotherms at 77 K in the relative pressure region of 0.22 < p/p<sub>0</sub> < 0.96.

<sup>b</sup> calculated from N<sub>2</sub> adsorption-desorption isotherms.

<sup>c</sup> peak pore size evaluated from BJH pore size determination.

**Table S3** The CO<sub>2</sub> sorption data for poly[veim][Tf<sub>2</sub>N] and its SMI-poly[veim][Tf<sub>2</sub>N] materials between 1.0 to 20 bar pressure and at constant temperature of 298 K.

| Sample name                                   | Pressure (bar) |       |       |       |       |
|-----------------------------------------------|----------------|-------|-------|-------|-------|
|                                               | 1              | 5     | 10    | 15    | 20    |
| Poly[veim][Tf <sub>2</sub> N]                 | 0.24           | 4.08  | 9.47  | 12.80 | 14.62 |
| Poly[veim][Tf <sub>2</sub> N]+0.1% surfactant | 0.32           | 5.30  | 12.37 | 18.62 | 22.28 |
| Poly[veim][Tf <sub>2</sub> N]+0.5% surfactant | 0.35           | 7.68  | 17.29 | 25.37 | 30.68 |
| Poly[veim][Tf <sub>2</sub> N]+1.0% surfactant | 0.41           | 13.21 | 25.82 | 34.75 | 41.31 |
| Poly[veim][Tf <sub>2</sub> N]+2.0% surfactant | 0.31           | 9.33  | 20.34 | 27.82 | 33.52 |
| Poly[veim][Tf <sub>2</sub> N]+3.0% surfactant | 0.29           | 6.54  | 15.49 | 23.54 | 28.39 |
| Poly[veim][Tf <sub>2</sub> N]+5.0% surfactant | 0.28           | 5.69  | 13.72 | 21.52 | 26.53 |
| Poly[veim][Tf <sub>2</sub> N]+10% surfactant  | 0.27           | 4.80  | 10.98 | 15.45 | 18.42 |

**Table S4** Comparison of CO<sub>2</sub> adsorption capacity of various IL based materials with the present study. \*

| Material                                     | Temperature (K) | Pressure (bar) | CO <sub>2</sub> adsorption capacity (mmol/g) | Reusability of material                                      | Reference  |
|----------------------------------------------|-----------------|----------------|----------------------------------------------|--------------------------------------------------------------|------------|
| Amine-functionalized PIL brushes on TiNTs    | 298             | 1.0            | 2.43                                         | only 40% capacity retained after 2 cycles                    | [1]        |
| Encapsulated [Emim][Tf <sub>2</sub> N]       | 296             | 25             | 2.46                                         | necessitated 25 bar pressure for the material desorption     | [2]        |
| [Hmim][Tf <sub>2</sub> N]                    | 296             | 25             | 3.05                                         |                                                              |            |
| ILP- N-CNC-Fe-Si                             | 298             | 1.0            | 2.14                                         | nearly 90% reusable capacity retained after 20 cycles of use | [3]        |
| PVIm-6-SCD                                   | 273             | 1.0            | 3.60                                         | reusability of material tested for 6 cycles only             | [4]        |
| [APMIM]Br@NaY                                | 298             | 1.0            | 4.94                                         | 280 °C needed for regeneration >90% capacity after 10 cycles | [5]        |
| OMS-IL(AA)                                   | 298             | 1.0            | 0.61                                         | high temperature (~107 °C) needed for regeneration           | [6]        |
| PMMA-[N1111][Gly]                            | 308             | 1.0            | 2.14                                         | not reported                                                 | [7]        |
| CB-PCPs                                      | 273             | 1.0            | 2.0                                          | not reported                                                 | [8]        |
| SiO <sub>2</sub> -P(VBTMA)(BF <sub>4</sub> ) | 303             | 1.0            | 0.40                                         | not reported                                                 | [9]        |
| P(SVImTf <sub>2</sub> N)                     | 273             | 1.0            | 0.46                                         | not reported                                                 | [10]       |
| SMI-poly[veim][Tf <sub>2</sub> N]            | 298             | 1.0            | 0.41                                         | found >96% capacity after                                    | This study |
|                                              |                 | 5.0            | 13.21                                        | 15 consecutive cycles                                        |            |
|                                              |                 | 10             | 25.82                                        | only 70 °C required for material                             |            |
|                                              |                 | 15             | 34.75                                        | regeneration                                                 |            |
|                                              |                 | 20             | 41.32                                        |                                                              |            |

\* Authors are aware of the problem to compare CO<sub>2</sub> adsorption and reusability of the materials under different pressures. We have performed a literature search to find the studies reported at similar conditions which we used for the SMI-poly[veim][Tf<sub>2</sub>N] materials. However, we were unable to find the work conducted at similar operating pressure and temperature. The above Table is aimed to provide only some basic information that describes the efficiency of synthesized SMI-ILPs over other reported IL polymers in terms of CO<sub>2</sub> sorption particularly under high operating pressures and reusability under mild operating conditions.

## References

- 1 J. Yuan, M. Fan, F. Zhang, Y. Xu, H. Tang, C. Huang and H. Zhang, *Chem. Eng. J.*, 2017, **316**, 903-910.
- 2 S. Kaviani, S. Kolahchyan, K. L. Hickenbottom, A. M. Lopez and S. Nejati, *Chem. Eng. J.*, 2018, **354**, 753-757.
- 3 L. Liu, J. Lu, Y. Zhang, M. Liu, Y. F. Yu and A. Chen, *New Carbon Mater.*, 2017, **32**, 380-384.
- 4 Y. Xie, J. Liang, Y. Fu, M. Huang, X. Xu, H. Wang, S. Tu and J. Li, *J. Mater. Chem. A*, 2018, **6**, 6660-6666.
- 5 Y. Yu, J. Mai, L. Wang, X. Li, Z. Jiang and F. Wang, *Sci. Rep.*, 2014, **4**, 5997.
- 6 V. Hiremath, A. H. Jadhav, H. Lee, S. Kwon and J. G. Seo, *Chem. Eng. J.*, 2016, **287**, 602-617.
- 7 J. Ren, Z. Li, Y. Chen, Z. Yang and X. Lu, *Chin. J. Chem. Eng.*, 2018, **26**, 2377-2384.
- 8 A. Dani, V. Crocell, C. Magistris, V. Santoro, J. Yuan and S. Bordiga, *J. Mater. Chem. A*, 2017, **5**, 372-383.
- 9 H. Cheng, P. Wang, J. Luo, J. Fransær, D. E. De Vos and Z. H. Luo, *Ind. Eng. Chem. Res.*, 2015, **54**, 3107-3115.
- 10 A. Wilke, J. Yuan, M. Antonietti and J. Weber, *ACS Macro. Lett.*, 2012, **1**, 1028-1031.
